# Supplementary material
Source: publisher figshare collection journal article supplement (https://future-science-group.figshare.com/articles/dataset/_/21617628)
Supplement: Supplementary file 1 [file 1]

## Sheet: Supplemental Table S8
Supplemental Table S8. Results of qRT-PCR analysis of DNAJA4 after transfecting siDNAJA4
Samples	CT						ΔCT	ΔΔCT	2-ΔΔCT
	GAPDH			DNAJA4
Control_1	16.45	16.5	16.41	26.03	26.04	26.01	9.57
siDNAJA4 #1_1	16.22	16.31	16.15	26.78	26.82	26.63	10.51	0.94	0.52
siDNAJA4 #2_1	16.45	16.46	16.5	26.84	26.87	26.78	1036	0.78	0.57
Control_2	16.5	16.41	16.49	26.07	26.09	26.1	11.53
siDNAJA4 #1_2	15.86	15.8	15.72	26.47	26.51	26.49	9.46	1.08	0.47
siDNAJA4 #2_2	16.53	16.52	16.66	27.11	27.15	27.29	10.61	0.99	0.5
Control_3	16.48	16.53	16.52	26.08	26.05	26.1	13.19
siDNAJA4 #1_3	15.99	15.89	16.12	26.55	26.67	26.77	10.92	1.09	0.46
siDNAJA4 #2_3	16.67	16.62	16.54	27.04	27.05	27.05	10.44	0.87	0.54
